1

2 **Effects of Malaise trap spacing on species richness and composition of terrestrial arthropod**  
3 **bulk samples**

4

5 Steinke D<sup>1,2</sup>, Braukmann TWA<sup>1</sup>, Manerus L, Woodhouse A<sup>3</sup>, Elbrecht V<sup>1,4</sup>

6

7 Affiliations:

8 <sup>1</sup>Centre for Biodiversity Genomics, University of Guelph, 50 Stone Road East, Guelph, Ontario,  
9 N1G 2W1, Canada

10 <sup>2</sup>Department of Integrative Biology, University of Guelph, 50 Stone Road East, Guelph, Ontario,  
11 N1G 2W1, Canada

12 <sup>3</sup>Optimist Club of Kitchener-Waterloo

13 <sup>4</sup>Centre for Biodiversity Monitoring, Zoological Research Museum Alexander Koenig, Bonn,  
14 Germany

15

16 \*Corresponding author: Dirk Steinke ([dsteinke@uoguelph.ca](mailto:dsteinke@uoguelph.ca))

17

18

19

## 20 **Abstract**

21 The Malaise trap has gained popularity for assessing diverse terrestrial arthropod communities  
22 because it collects large samples with modest effort. A number of factors that influence collection  
23 efficiency, placement being one of them. For instance, when designing larger biotic surveys using  
24 arrays of Malaise traps we need to know the optimal distance between individual traps that  
25 maximises observable species richness and community composition. We examined the influence  
26 of spacing between Malaise traps by metabarcoding samples from two field experiments at a site  
27 in Waterloo, Ontario, Canada. For one experiment, we used two trap pairs deployed at weekly  
28 increasing distance (3m increments from 3 to 27 m). The second experiment involved a total of 10  
29 traps set up in a row at 3m distance intervals for three consecutive weeks.

30 Results show that community similarity of samples decreases over distance between traps. The  
31 amount of species shared between trap pairs shows drops considerably at about 15m trap-to-trap  
32 distance. This change can be observed across all major taxonomic groups and for two different  
33 habitat types (grassland and forest). Large numbers of OTUs found only once within samples cause  
34 rather large dissimilarity between distance pairs even at close proximity. This could be caused by  
35 a large number of transient species from adjacent habitat which arrive at the trap through passive  
36 transport, as well as capture of rare taxa, which end up in different traps by chance.

37

## 38 **Keywords**

39 Metabarcoding, insects, biodiversity, biomonitoring, experimental design

40

41

## 42 **Introduction**

43

44 *During my extensive travels I have repeatedly found that insects happened to enter my tent, and*  
45 *that they always accumulated at the ceiling-corners in vain efforts to escape at that place without*  
46 *paying any attention to the open tent-door. On one occasion one of the upper tent-corners*  
47 *happened to have a small hole torn in the fabric, and through this hole all the insects pressed their*  
48 *way and escaped. Later on the idea occurred to me, that, if insects could enter a tent and not find*  
49 *their, way out, and always persistently tried to reach the ceiling, a trap, made as invisible as*

50 *possible and put up at a place where insects are wont to patrol back and forth, might catch them*  
51 *much better than any tent and perhaps better than a man with a net...*

52 *Rene Malaise 1937*

53

54 The inclusion of terrestrial invertebrates in biodiversity inventories and surveys has increased  
55 substantially over the past years (Dopheide et al. 2019, Drake et al. 2007) but sampling efficiency  
56 remains a key consideration when designing larger censuses (Telfer et al. 2015, Timms et al. 2012).  
57 Although no single sampling can be used to survey all taxa at a given site, the Malaise trap (Malaise  
58 1937) has gained popularity for assessing terrestrial arthropod communities (Karlsson et al. 2005)  
59 because it collects large and diverse samples with fairly little effort. Malaise's (1937) invention is  
60 a tent-like flight-interception trap made from fine mesh netting with a central screen suspended  
61 below a sloping ridge-roof that leads to a collecting bottle at the upper end. Flying insects that hit  
62 the screen, subsequently fly or walk along this roof to the bottle which is usually filled with >90%  
63 ethanol as preservative. Traps are usually deployed in a way that the central mesh intercepts the  
64 flying path of insects. There are a number of different designs available although the most  
65 commonly used traps are so called Townes-Style traps (Townes 1972) and derived versions of it  
66 (e.g. ez-Malaise traps). The trap is particularly well suited for inventory because it catches a wide  
67 variety of flying insects and some ground active insects that climb up the trap fabric. Malaise  
68 trapping is easy, requires modest labour and as such represents one of the best mass-collecting  
69 methods available for terrestrial invertebrates (deWaard et al 2018).

70 Initially Malaise traps were considered of limited use in conservation evaluation and bio-  
71 surveillance because of the huge size of their catch (Drake et al. 2007) which made it difficult to  
72 characterize the community using traditional morphology-based methods (Cook et al. 2010).  
73 Consequently, larger surveys used total biomass rather than detailed identification of specimens.  
74 In fact one of the recent reports on the dramatic decline of terrestrial arthropod abundance was the  
75 result of a long-term study using Malaise traps and catch biomass (Hallmann et al. 2017). The  
76 recent advent of DNA barcoding (Hebert et al. 2003) and metabarcoding (Taberlet et al. 2012)  
77 opened the door to more comprehensive estimates of species richness and community composition  
78 (Braukmann et al. 2019, Yu et al. 2012, Steinke et al. 2020) and Malaise traps are poised to become  
79 a ubiquitous tool for biodiversity surveys (Geiger et al. 2016). It seems that large scale or global

80 high-resolution monitoring networks are within our reach (Hobern & Hebert 2019) but there are  
81 still a number of challenges in relation to the small scale variability of many terrestrial habitats.

82 There are various factors that influence the efficiency of Malaise traps. Temperature,  
83 precipitation, and wind are considered important as largest catches generally occur on hot, dry,  
84 and still days (Matthews & Matthews 1971). It has also been noted (Townes 1962) that insects  
85 often fly closer to the ground in spring because of the warmer air there, thereby increasing the  
86 number of individuals caught during this season. As a Malaise trap samples only those arthropods  
87 that happen to fly through a relatively small area, trap placement becomes an important  
88 consideration. Height of surrounding vegetation and location in shade or sun can alter trap  
89 performance and efficiency (Matthews & Matthews 1971, Ssymank et al. 2018). Another relevant  
90 but not systematically studied variable is the distance between traps in a sampling area. This is a  
91 particular important consideration when designing larger biotic surveys using arrays of traps. For  
92 instance, it is not known how many traps at what distance are needed to maximise observable  
93 species richness and community composition for a given location.

94 The main objective of this study was to examine the effects of spacing between traps on species  
95 richness and composition of Malaise trap samples. Bulk samples from two field experiments at a  
96 site in Waterloo, Ontario, Canada were assessed using metabarcoding to determine if (1) there is  
97 a critical distance between traps at which species overlap drops significantly and if (2) structural  
98 composition of habitats has an influence on such a distance.

99

## 100 **Materials & Methods**

101

### 102 *Site and sampling*

103 Arthropod bulk samples were collected using ez-Malaise traps (Bugdorm, Taiwan). Traps for  
104 the first experiments (Figure 1a) were deployed in both a grassland and a forested pond area near  
105 Waterloo, Ontario, Canada. Traps for experiment 2 (Figure 1b,c) were positioned only in the  
106 grassland area. For the first experiment we used two trap pairs that were deployed next to each  
107 other (3m distance between both collecting bottles) respectively. Each week trap spacing for each  
108 pair was increased by three meters to a maximum distance of 27m (Figure 1a). Samples were  
109 collected every week before moving one trap further away. Each time we cleaned trap heads  
110 (collecting area with bottles) using bleach and ethanol to minimize cross-contamination between

111 sampling events. The second experiment involved a total of 10 traps set up in 3m distance intervals  
112 for three consecutive weeks (Figure 1b,c). Samples were also collected each week sample bottles  
113 were stored at -20 °C for further analysis.

114

### 115 *Molecular analysis*

116 All samples were dried at room temperature for three days in a disposable grinding chamber.  
117 Each sample was ground to fine powder using an IKA Tube Mill control (IKA, Breisgau,  
118 Germany) at 25,000 rpm for 2 × 3 min. DNA was extracted from approximately 20 mg of ground  
119 tissue using the DNeasy Blood & Tissue kit (Qiagen, Venlo, Netherlands) following manufacturer  
120 protocols.

121 Metabarcoding was carried out using a two-step fusion primer PCR protocol (Elbrecht &  
122 Steinke 2019). During the first PCR step, a 421 bp region of the Cytochrome c oxidase subunit I  
123 (COI) was amplified using the BF2 + BR2 primer set (Elbrecht & Leese 2017, Elbrecht et al.  
124 2019). PCR reactions were carried out in a 25 µL reaction volume, with 0.5 µL DNA, 0.2 µM of  
125 each primer, 12.5 µL PCR Multiplex Plus buffer (Qiagen, Hilden, Germany). The PCR was carried  
126 out in a Veriti thermocycler (Thermo Fisher Scientific, MA, USA) using the following cycling  
127 conditions: initial denaturation at 95 °C for 5 min; 25 cycles of: 30 sec at 95 °C, 30 sec at 50 °C  
128 and 50 sec at 72 °C; and a final extension of 5 min at 72 °C. PCR success was checked on a 1%  
129 agarose gel. One µL of PCR product was used as template for the second PCR, where Illumina  
130 sequencing adapters were added using individually tagged fusion primers (Elbrecht & Steinke  
131 2019). Tagging combinations are available in Table S1. We mainly used the same thermocycler  
132 conditions as in the first PCR but the reaction volume was increased to 35 µL, the cycle number  
133 reduced to 20 and extension time increased to 2 minutes per cycle. PCR success was again checked  
134 on a 1% Agarose gel. PCR products were purified and normalized using SequalPrep Normalization  
135 Plates (Thermo Fisher Scientific, MA, USA, Harris et al., 2010) according to manufacturer  
136 protocols. Ten µL of each normalised sample were pooled, and the final library cleaned using left  
137 sided size selection with 0.76x SPRIselect (Beckman Coulter, CA, USA. Sequencing was carried  
138 out by the Advances Analysis Facility at the University of Guelph using the 600 cycle Illumina  
139 MiSeq Reagent Kit v3 and 5% PhiX spike in. The read length of read one was increased to 316  
140 bp, while keeping read 2 to 300 bp. As we only used inline barcodes for sample tagging, both  
141 Illumina indexing read steps were skipped.

142

### 143 *Data processing*

144 Initial quality control of raw sequence data was done using FastQC v0.11.8. Subsequently,  
145 sequence data were processed using the JAMP pipeline v0.69 ([github.com/VascoElbrecht/JAMP](https://github.com/VascoElbrecht/JAMP))  
146 starting with demultiplexing, followed by paired-end merging using Usearch v11.0.667 with  
147 `fastq_pctid=75` (Edgar 2010). Primer sequences were trimmed from each sequence using Cutadapt  
148 v1.18 with default settings (Martin 2011), retaining only sequences where primers were  
149 successfully trimmed at both ends. Cutadapt was also used to remove sequences shorter than 411  
150 bp and longer than 431 bp. Sequences with poor quality were removed using an expected error  
151 value of 1 (Edgar & Flyvbjerg 2015) as implemented in Usearch. Filtered reads of each sample  
152 were dereplicated and singletons removed, before pooling all reads for OTU clustering with  
153 Usearch `cluster_otus` at a 97% similarity threshold. Duplicated reads from each sample including  
154 singletons were mapped back against generated OTUs using Usearch `usearch_global`, to generate  
155 a OTU table. The maximum read count for each OTU across all 12 negative controls was  
156 multiplied by two, and subtracted from corresponding OTU read counts in all samples. Taxonomy  
157 was assigned by using OTUs as queries for the BOLD reference database ([www.boldsystems.org](http://www.boldsystems.org)  
158 Ratnasingham & Hebert 2007) utilizing the JAMP `Bold_web_hack` script with default settings.  
159 Only OTUs with a minimum match of 98% were retained for further analysis. For most analysis  
160 carried out in R v3.5.1, relative read counts were used, and only reads above 0.01% abundance  
161 were considered.

162

### 163 *Statistical analysis*

164 OTU tables (Table S2) were used to calculate both the number of OTUs shared as well as the  
165 Bray-Curtis dissimilarity between all trap pairs for both experiments. In order to determine OTU  
166 sampling effort we calculated accumulation curves for both experiments using the function  
167 `specaccum` and extrapolated species richness for each week using `specpool`, both part of the `vegan`  
168 package (Oksanen et al. 2018). Pairwise OTU overlap among trap distance pairs was evaluated  
169 using the nonparametric multiple comparison function implemented in the R package `dunn.test`  
170 1.2.4 (Dinno 2016) which is equivalent to the Kruskal-Wallis test.

171

172

173

## 174 **Results**

175 We were able to extract high quality DNA from most samples, and obtained strong bands for  
176 all 74 samples after the second PCR step (Suppl Figure). Illumina sequencing generated  
177 13,910,614 reads (partial run shared with other projects), with the raw data being available on  
178 NCBI SRA with the accession number SRP200574. About 27% of the reads were filtered during  
179 data processing, leaving an average of about 137,181 sequences per sample. In total, 10,151,381  
180 post-filtering reads could be used for clustering with Usearch.

181 Our analysis shows a total of 2,315 OTUs for the grassland site and 2,804 OTUs for the forest  
182 pond site in experiment 1 (Figure 2a). On average about half of those (49%) were only detected  
183 once over the entire experiment. The Chao 1 (Magurran, 2003) species estimates for the total  
184 number of OTUs possible with complete sampling were  $3,847 \pm 119$  and  $4,550 \pm 129$  respectively.  
185 Both sites had a total of 860 OTUs in common. Bray-Curtis dissimilarity between samples of  
186 distance pairs was generally high ( $>0.67$ ) for both sites and all distances, however dissimilarity at  
187 both sites increased significantly (Kruskal-Wallis and Dunn's posthoc  $p < 0.0001$ ) at 18m distance  
188 (Figure 2b). Overall, the proportion of OTUs shared between trap pairs ranged from 26-27%.

189 The total OTU count for the grassland site comprised 21 orders with six orders (Coleoptera,  
190 Diptera, Hemiptera, Hymenoptera, Lepidoptera, Orthoptera) representing 97% of all specimens  
191 (Table S1). We found 20 orders at the forest pond site with five orders (Coleoptera, Diptera,  
192 Hemiptera, Hymenoptera, Lepidoptera) representing 96% of all specimens (Table S3). About 1/3  
193 of OTUs was shared between both sites. We observed a distinct drop in the number of species  
194 shared between traps at a distance of 15m for both the grassland (Figure 2c) and the forest pond  
195 site (Figure 2d).

196 For experiment 2 we found totals of 1,017, 662, and 738 OTUs for weeks 1-3 (Figure 3a, Figure  
197 S1). The total number of OTUs found over the three weeks was 1,610. Chao estimates for the  
198 expected amount of total OTUs were  $2,007 \pm 117$ ,  $1,211 \pm 80$ ,  $1,479 \pm 102$  for weeks one to three,  
199 respectively. Dissimilarity values for experiment 2 were generally higher with weekly averages  
200 ranging from 0.75 (week 2) to 0.92 (week 3) (Figure 3b). The values gradually increased with  
201 increasing distance between two traps. In addition more than half of the OTUs obtained in in three  
202 weeks of experiment 2 (811) were only detected in a single trap following a common hollow curve  
203 species abundance pattern (Figure S2).

204 OTUs found during experiment 2 comprised 15-18 orders with the five orders Coleoptera,  
205 Diptera, Hemiptera, Hymenoptera, and Lepidoptera representing between 85-95% of all specimens  
206 (Table S3). In contrast to experiment 1, each week we observed a constant decline of the number  
207 of species shared between traps with increased distance between them (Figure 3c).

208

209

## 210 **Discussion**

211 Malaise traps as sampling method for terrestrial arthropod communities represent a rather  
212 efficient and economical means for obtaining comprehensive samples with minimal effort  
213 (Karlsson et al. 2005). They can be operated continuously in any weather with only occasional  
214 attendance and deliver large sample sizes. In conjunction with modern DNA-based methods to  
215 assign taxonomy (e.g. metabarcoding) they probably represent the best mass-collecting method  
216 available for terrestrial arthropods and are well suited for large scale biotic surveys using arrays of  
217 traps (Yu et al 2012, deWaard et al. 2018, Steinke et al 2020). However, so far it was not known  
218 how many traps at what distance are needed to maximise observable species richness and  
219 community composition for a given location (Noyes 1989). Various strategies have been applied  
220 but trap spacing varied considerably (Fraser et al. 2008, Santos et al. 2014). Results from our first  
221 experiment (Figure 1a, 2) suggest that deploying traps at about 15m distance from each other  
222 would significantly increase overall species richness and reduce overlap between traps. This is true  
223 for all major taxonomic groups collected (Figure 2 c, d). Interestingly, overall general habitat  
224 structure seems to have no effect on the distance observed as both, the grassland and the forest  
225 pond sites exhibit the same cut-off value. On the other hand, experiment 2 does not show such a  
226 clear drop in overlap between adjacent traps (Figure 3 c, d, e). For each week we were able to  
227 observe a more gradual decline in the number of OTUs overall and per taxonomic group  
228 respectively. This could be the result of the experimental set up we chose. A row of ten traps  
229 represents a continuous structure along which some animals have the ability to move before being  
230 caught. Along the row of traps the amount of observed OTUs varies which is likely the result of  
231 variation in microhabitat structure (Figure S1). The grassland chosen for the experiment was not  
232 entirely uniform and characterized by sporadic patches of golden rod (*Solidago canadensis*).

233 The large dissimilarity values observed in both our experiments (Figure 2b, 3b) are influenced  
234 by a large proportion of singleton OTUs. We are confident that these are mostly true specimens



235 rather than OTUs derived from sequencing or PCR errors, because we removed OTUs that did not  
236 match the BOLD database to at least 98%. Large numbers of OTUs found only once over a  
237 sampling period or between traps have been observed several times in other studies using Malaise  
238 traps (e.g. Geiger et al. 2016, deWaard et al. 2018, Steinke et al. 2020). This phenomenon has been  
239 discussed as an indicator for the presence of transient species (D'Souza & Hebert 2018, Steinke et  
240 al. 2020). Transient species have been defined as species that show up only occasionally as a result  
241 of dispersal from adjacent habitat (Snell Taylor et al. 2018). Specifically, many smaller species  
242 caught are not necessarily living in the sampled habitat but are rather passively transported there  
243 e.g. by wind. Additionally, sampling might be stochastic when it comes to rare or low abundant  
244 taxa.

245 Malaise trapping with only a few traps at a single site over a short timescale always provides  
246 an incomplete species list. That is no different for our study which suggests that additional trapping  
247 efforts by increasing the number of traps or by enlarging the trapping surface (e.g. Gressitt &  
248 Gressitt 1962) are needed to approach asymptotic species richness at both experimental sites. The  
249 trap results for experiment 1 suggest that it needs a 1.6-fold increase of the full sampling effort for  
250 a complete inventory (over the entire 10 weeks of the experiment) based on Chao-1. For  
251 experiment 2 sampling efforts would need to be doubled to obtain maximum species richness for  
252 the site in any given week. This could perhaps be accomplished by deploying a second row of ten  
253 traps at 15 m distance following the findings of experiment 1. The alternative would be to increase  
254 the sampling duration (Fraser et al. 2008) or the sampling surface of the traps (Gressitt & Gressitt  
255 1962).

256 In conclusion, our results suggest the following recommendations for sampling and monitoring  
257 terrestrial invertebrate communities with Malaise traps: (a) within a temperate and uniform habitat  
258 a number of traps equally spaced at >15m will sample more of the local diversity while at the same  
259 time reduce the extend of repetitive sampling, (b) longer trapping duration can help to reach  
260 asymptotic species richness and lead to more complete species lists, and (c) future work should  
261 include research on the origin and the role of singletons. Are they in fact transient species passively  
262 dispersed towards the trap or low abundant resident core species that are not efficiently detected?

263

264 **Acknowledgements**

265 This study was supported by funding through the Canada First Research Excellence Fund. It  
266 represents a contribution to the University of Guelph Food From Thought research program. We  
267 thank the Optimist Club of Kitchener-Waterloo for access to their site at Camp Heidelberg. We  
268 are grateful to peer reviewers and editors who provided comments that improved the manuscript.

269

#### 270 **Author contributions**

271 DS developed the concept, DS and VE designed the experiments and carried out the sampling,  
272 VE and LM did the laboratory work, DS and VE analysed the data, DS wrote the paper, VE,  
273 AW, and TB revised the paper and provided input throughout the study .

274

275

#### 276 **References**

277 Beng KC, Tomlinson KW, Shen XH, Surget-Groba Y, Hughes AC, Corlett RT, Slik WF (2016).

278 The utility of DNA metabarcoding for studying the response of arthropod diversity and  
279 composition to land-use change in the tropics. *Scientific Reports*, 1–13.

280 Braukmann TWA, Prosser SJR, Ivanova NV, Elbrecht V, Steinke D, Ratnasingham R, deWaard

281 JR, Sones JE, Zakharov EV, Hebert PDN (2019). Metabarcoding a Diverse Arthropod Mock  
282 Community. *Molecular Ecology Resources* 19: 711-727.

283 Bush A, Sollmann R, Wilting A, Bohmann K, Cole B, Balzter H, Martius C, Zlinszky A,

284 Calvignac-Spencer S, Cobbold CA, Dawson TP, Emerson BC, Ferrirer S, Gilbert MTP,

285 Herold M, Jones L, Leendertz FH, Matthews L, Millington JDA, Olson JR, Ovaskainen O,

286 Raffaelli D, Reeve R, Rödel M-O, Rodgers TW, Snape S, Visseren-Hamakers I, Vogler AP,

287 White PCL, Wooster MJ, Yu DW (2017). Connecting Earth observation to high-throughput  
288 biodiversity data. *Nature Ecology & Evolution* 1: 0176.

289 Cook LG, Edwards RD, Crisp MD, Hardy NB (2010). Need morphology always be required for  
290 new species descriptions? *Invertebrate Systematics* 24: 322-326.

291 deWaard JR, Levesque-Beaudin V, deWaard SL, Ivanova NV, McKeown JTA, Miskie R, Naik S,

292 Perez KHJ, Ratnasingham S, Sobel CN, Sones JE, Steinke C, Telfer AC, Young A, Young

293 MR, Zakharov EV, Hebert PDN (2018). Expedited assessment of terrestrial arthropod

294 diversity by coupling Malaise traps with DNA barcoding. *Genome* 62: 85-95.

- 295 Dinno A (2016). dunn.test: Dunn's Test of Multiple Comparisons Using Rank Sums. R package  
296 version 1.3.2.. <http://CRAN.R-project.org/package=dunn.test>.
- 297 Dopheide A, Tooman LK, Grosser S, Agabiti B, Rhode B, Xie D, Stevens MI, Nelson N, Buckley,  
298 TR, Drummond AJ, Newcomb RD (2019). Estimating the biodiversity of terrestrial  
299 invertebrates on a forested island using DNA barcodes and metabarcoding data. *Ecological*  
300 *Applications* 29: e01877.
- 301 Drake CM, Lott DA, Alexander KNA, Webb J (2007). Surveying terrestrial and freshwater  
302 invertebrates for conservation evaluation. Natural England Research Report NERR005,  
303 Sheffield, UK.
- 304 Edgar RC (2010). Search and clustering orders of magnitude faster than BLAST.  
305 *Bioinformatics* 26: 2460-2461.
- 306 Edgar RC, Flyvbjerg H (2015). Error filtering, pair assembly and error correction for next-  
307 generation sequencing reads. *Bioinformatics* 31: 3476-3482.
- 308 Elbrecht V, Leese F (2017). Validation and development of COI metabarcoding primers for  
309 freshwater macroinvertebrate bioassessment. *Frontiers of Environmental Science* 5: 11.
- 310 Elbrecht V, Steinke D (2019). Scaling up DNA metabarcoding for freshwater macrozoobenthos  
311 monitoring. *Freshwater Biology* 64: 380-387.
- 312 Elbrecht V, Braukmann TWA, Ivanova NV, Prosser SWJ, Hajibabaei M, Wright M, Zakharov  
313 EV, Hebert PDN, Steinke D (2019): Validation of COI metabarcoding primers for terrestrial  
314 arthropods. *PeerJ* 7: e7745.
- 315 Fraser SEM, Dytham FC, Mayhew PJ (2008). The effectiveness and optimal use of Malaise traps  
316 for monitoring parasitoid wasps. *Insect Conservation and Diversity* 1: 22–31.
- 317 Geiger MF, Moriniere J, Hausmann A, Haszprunar G, Waegle W, Hebert PDN, Rulik B (2016).  
318 Testing the Global Malaise Trap Program – How well does the current barcode reference  
319 library identify flying insects in Germany? *Biodiversity Data Journal* 4: e10671.
- 320 Gressitt JL, Gressitt MK (1962). An improved Malaise trap. *Pacific Insects* 4(1): 87-90.
- 321 Hallmann CA, Sorg M, Jongejans E, Siepel H, Hofland N, Schwan H, Stenmans W, Müller A,  
322 Sumser H, Hörren T, Goulson D, de Kroon H (2017). More than 75 percent decline over 27  
323 years in total flying insect biomass in protected areas. *PLoS ONE* 12 (10): e0185809.

- 324 Harris JK, Sahl JW, Castoe TA, Wagner BD, Pollock DD, Spear JR (2010). Comparison of  
325 normalization methods for construction of large, multiplex amplicon pools for next-generation  
326 sequencing. *Applied and Environmental Microbiology* 76: 3863–3868.
- 327 Hobern D, Hebert PDN (2019). BIOSCAN – Revealing eukaryote diversity, dynamics and  
328 interactions. *Biodiversity Information Science and Standards* 3: e37333.
- 329 Karlsson D, Pape T, Johanson KA, Liljeblad J, Ronquist, F (2005). The Swedish Malaise Trap  
330 Project, or how many species of Hymenoptera and Diptera are there in Sweden? *Entomologisk*  
331 *Tidskrift* 126: 43-53.
- 332 Magurran AE (2003). *Measuring Biological Diversity*. Wiley-Blackwell, Malden, Massachusetts.  
333 264 pp.
- 334 Malaise R (1937). A new insect trap. *Entomologisk tidskrift* 58: 148-160.
- 335 Martin M. 2011. Cutadapt removes adapter sequences from high-throughput sequencing  
336 reads. *EMBnet Journal* 17(1):10-12.
- 337 Matthews RW, Matthews JR (1971). The Malaise Trap: Its Utility and Potential for Sampling  
338 Insect Populations. *The Great Lakes Entomologist* 4: 117-122.
- 339 Noyes, JS (1989). A study of five methods of sampling Hymenoptera (Insecta) in a tropical  
340 rainforest, with special reference to the Parasitica. *Journal of Natural History* 23: 285–298.
- 341 Oksanen J, Blanchet FG, Friendly M, Kindt R, Legendre P, McGlinn D, Minchin PR, O’Hara  
342 RB, Simpson GL, Solymos P, Stevens MHH, Szoecs E, Wagner H (2018). *vegan: Community*  
343 *Ecology Package*. R package version 2.5-1. <https://CRAN.R-project.org/package=vegan>.
- 344 R Core Team (2018). *R: A language and environment for statistical computing*. R Foundation for  
345 *Statistical Computing*, Vienna, Austria. URL <https://www.R-project.org/>.
- 346 Santos EFD, Noll FB, Brandao CRF (2014). Functional and Taxonomic Diversity of Stinging  
347 Wasps in Brazilian Atlantic Rainforest Areas. *Neotrop Entomol.* 43, 97–105.
- 348 Snell Taylor SJ, Evans BS, White EP, Hurlbert AH (2018). The prevalence and impact of  
349 transient species in ecological communities. *Ecology* 99(8): 1825-1835.
- 350 Steinke D, de Waard S, Sones, JE, Ivanova NV, Prosser SJR, Perez K, Braukmann TWA, Milton  
351 M, Borisenko, A, Elbrecht V, Zakharov EV, deWaard JR, Ratnasingham S, Hebert PDN  
352 (2020). Message in a bottle – Ecoregion biodiversity surveys using Malaise Traps.  
353 Submitted/preprint.

- 354 Ssymank A, Sorg M, Doczkal D, Rulik B, Merkel-Wallner G, Vischer-Leopold M (2018).  
355 Praktische Hinweise und Empfehlungen zur Anwendung von Malaisefallen für Insekten in der  
356 Biodiversitätserfassung und im Monitoring. Series Naturalis 1:1-12.
- 357 Taberlet P, Coissac E, Pompanon F, Brochmann C, Willerslev E (2012). Towards next-  
358 generation biodiversity assessment using DNA metabarcoding. *Molecular Ecology* 21: 2045-  
359 2050.
- 360 Telfer AC, Young MR, Quinn J, Perez K, Sobel CN, Sones JE, Levesque-Beaudin V, Derbyshire  
361 R, Fernandez-Triana J, Rougerie R, Thevanayagam A, Boskovic A, Borisenko AV, Cadel A,  
362 Brown A, Pages A, Castillo AH, Nicolai A, Mockford B, Mockford G, Bukowski B, Wilson  
363 B, Trojahn B, Lacroix CA, Brimblecombe C, Hay C, Ho C, Steinke C, Warne CP, Garrido  
364 Cortes C, Engelking D, Wright D, Lijtmaer DA, Gascoigne D, Hernandez Martich D,  
365 Morningstar D, Neumann D, Steinke D, DeBruin D, DeBruin M, Dobias D, Sears E, Richard  
366 E, Damstra E, Zakharov EV, Laberge F, Collins GE, Blagoev GA, Grainge G, Ansell G,  
367 Meredith G, Hogg I, McKeown J, Topan J, Bracey J, Guenther J, Sills-Gilligan J, Addesi J,  
368 Persi J, Layton KKS, D'Souza K, Dorji K, Grundy K, Nghidinwa K, Ronnenberg K, Min Lee  
369 K, Xie K, Lu L, Penev L, Gonzalez M, Rosati ME, Kekkonen M, Kuzmina M, Iskandar M,  
370 Mutanen M, Fatahi M, Pentinsaari M, Bauman M, Nikolova N, Ivanova NV, Jones N,  
371 Weerasuriya N, Monkhouse N, Lavinia PD, Jannetta P, Hanisch PE, McMullin RT, Ojeda  
372 Flores R, Mouttet R, Vender R, Labbee RN, Forsyth R, Lauder R, Dickson R, Kroft R, Miller  
373 SE, MacDonald S, Panthi S, Pedersen S, Sobek-Swant S, Naik S, Lipinskaya T, Eagalle T,  
374 Decaëns T, Kosuth T, Braukmann T, Woodcock T, Roslin T, Zammit T, Campbell T, Dinca  
375 V, Peneva V, Hebert PDN, deWaard JR (2015). Biodiversity inventories in high gear: DNA  
376 barcoding facilitates a rapid biotic survey of a temperate nature reserve. *Biodiversity Data  
377 Journal* 3: e6313.
- 378 Timms LL, Bowden JJ, Summerville KS, Buddle CM (2012). Does species-level resolution  
379 matter? Taxonomic sufficiency in terrestrial arthropod biodiversity studies. *Insect  
380 Conservation and Diversity* 6: 453-462.
- 381 Townes H (1962). Design for a Malaise Trap. *Proceedings of the Entomological Society  
382 Washington* 64: 253-262.
- 383 Townes H (1972). A light-weight Malaise trap. *Entomological News* 83: 239-247.

384 Yu DW, Ji Y, Emerson BC, Wang X, Ye C, Yang C, Ding Z (2012). Biodiversity soup:  
385 metabarcoding of arthropods for rapid biodiversity assessment and biomonitoring. *Methods in*  
386 *Ecology and Evolution* 3: 613-623.  
387  
388

389 **Figure legends**

390

391 **Figure 1:** Sampling design (trap distances over time) for experiment 1 (a) and experiment 2 (b).

392

393 **Figure 2:** Results for experiment 1. a) OTU accumulation curves for both sites by sample, b)

394 Histogram of Bray-Curtis dissimilarities between samples of distance pairs for both sites.

395 Number of shared OTUs per trap distance pair for the top five arthropod orders at grassland (c)

396 and forest pond (d) site.

397

398 **Figure 3:** Results for experiment 2. a) OTU accumulation curves for each sampling week by trap

399 b) Histogram of Bray-Curtis dissimilarities between samples of distance pairs for all weeks, c)

400 number of shared OTUs by trap distance for the top five arthropod orders for each week.

401

402

403 **Figure S1:** Histogram of OTU richness per trap (corresponding trap shown in photograph

404 below) per week of experiment 2.

405

406 **Figure S2:** Number of OTU occurrences in traps of experiment 2.

407

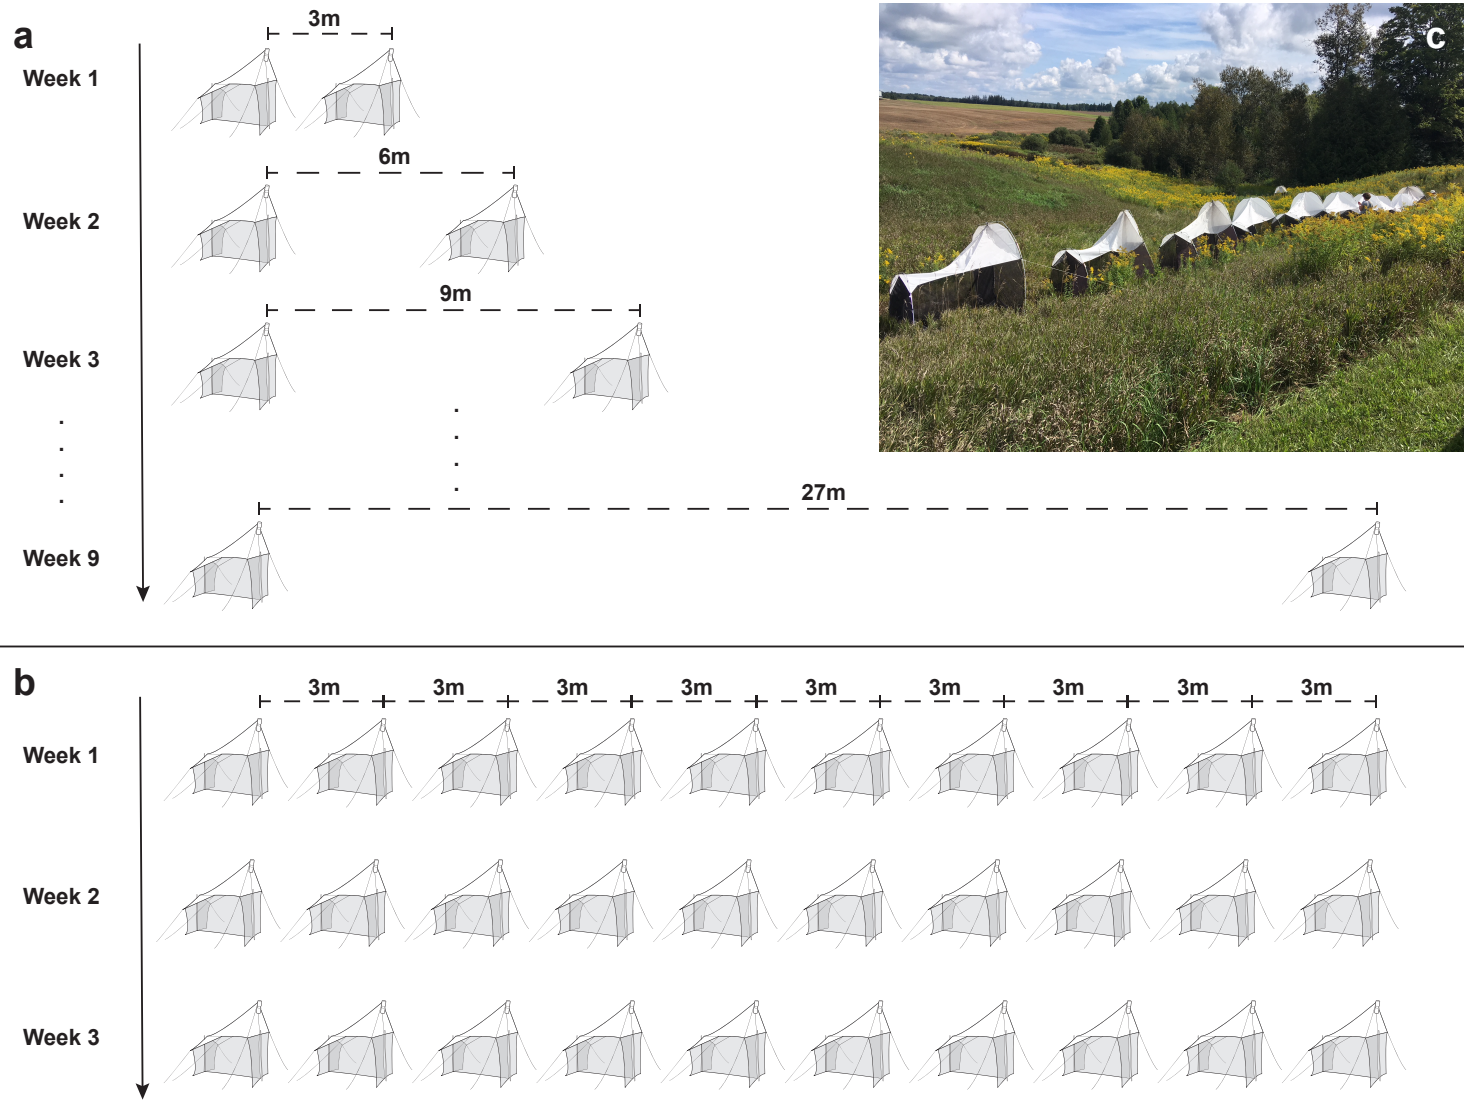



410 **Figure 2**

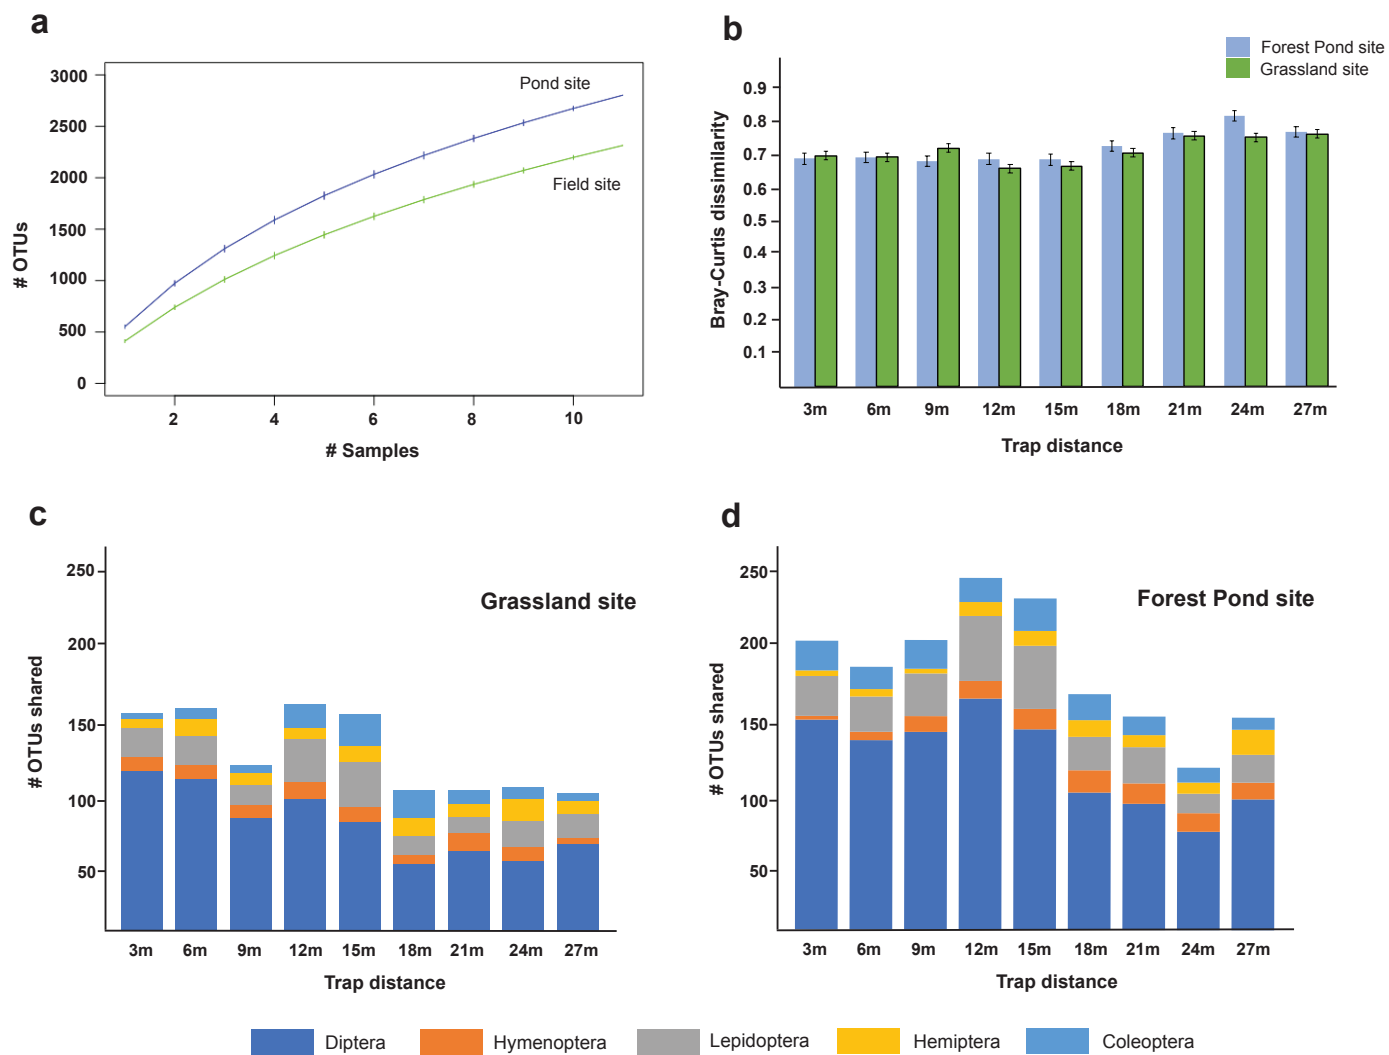

412 **Figure 3**

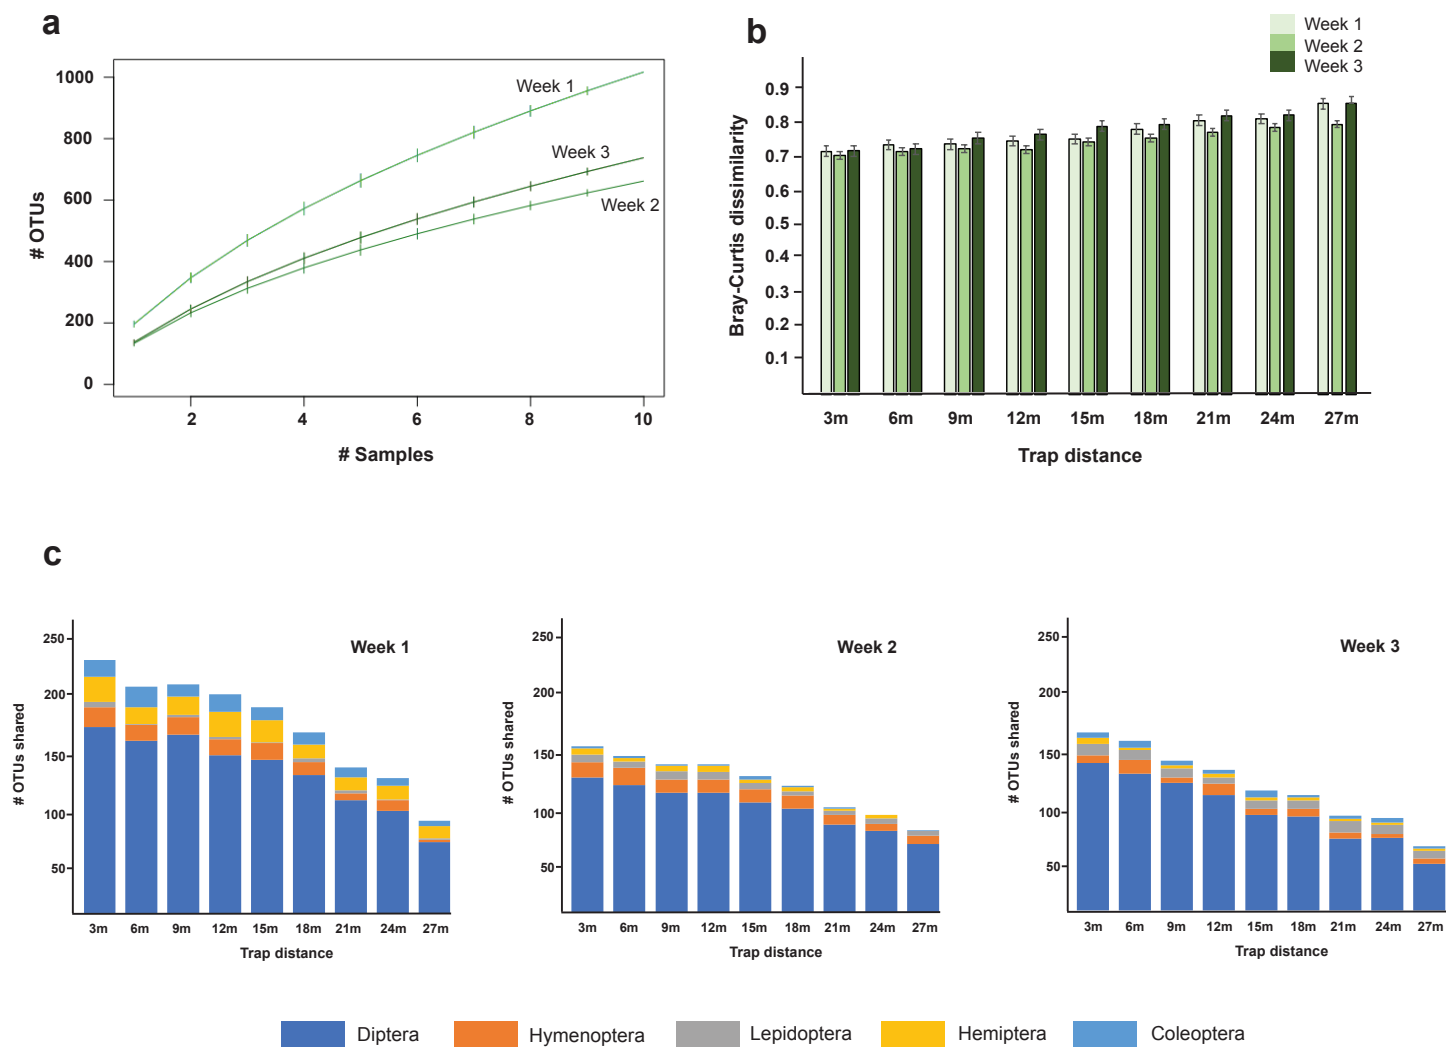

414 **Figure S1**

415

416

417

418

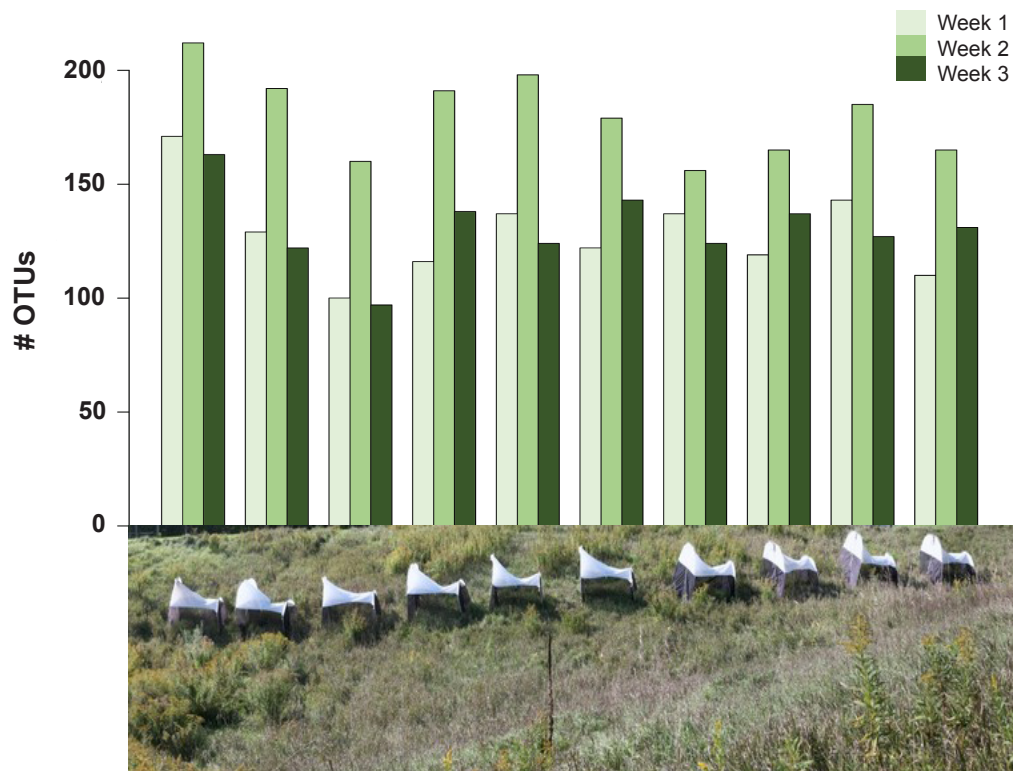

419

420

421 **Figure S2**  
422

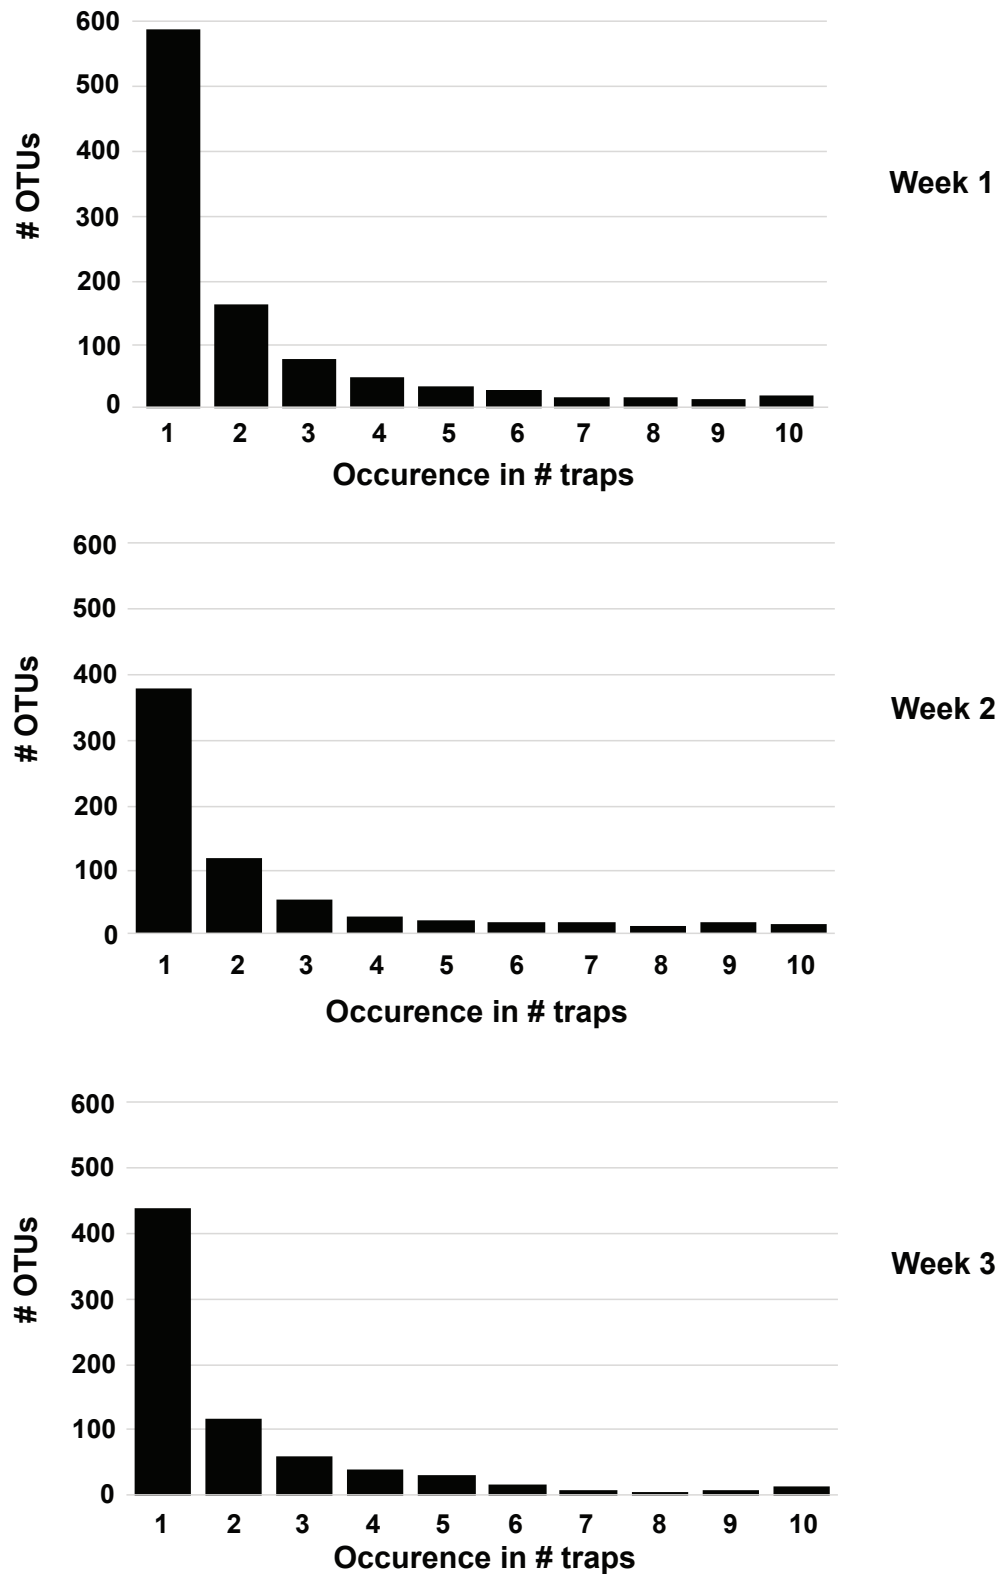

423

424 **Table S1:** Tagging layout

425 *TableS1\_Distance Layout.xls*

426

427 **Table S2:** OTU table (FC, FM, PC, PM – Experiment 1; A, B, F – Experiment 2; C – Controls)

428 *TableS2\_OTU Table.xlsx*

429

430 **Table S3:** Taxonomic breakdown by order for both experiments and sites

431 *TableS3\_taxonomic breakdown.xlsx*

432
